# Supplementary material for: Summary of the COVID-19 epidemic and estimating the effects of emergency responses in China
Source: PubMed Central journal article supplement (PMC7803947; doi:10.1038/s41598-020-80201-8), 2021-01-12
Supplement: 41598_2020_80201_MOESM1_ESM.pdf [file 41598_2020_80201_MOESM1_ESM.pdf]

## Supplementary Appendix - Summary of the COVID-19 epidemic and estimating the effects of emergency responses in China

Junwen Tao<sup>1,2</sup>, Yue Ma<sup>1,2</sup>, Caiying Luo<sup>1</sup>, Jiaqi Huang<sup>1</sup>, Tao Zhang<sup>1</sup>, Fei Yin<sup>1,\*</sup>

1: West China School of Public Health and West China Fourth Hospital, Sichuan University

2: These authors contributed equally to this article and share the first authorship

\*: Corresponding author: Fei Yin, email: scupublichealth@163.com

In order to assess the impact of the emergency response implemented in each province, we fitted the growth curves at two different periods, using the emergency response time and the average incubation period of seven days as the cut-off point.

**Supplementary Table S1** Emergency responses implemented date and two periods of fitting logistic growth model before and after the emergency responses

| Area                   | Emergency response date | Time period one | Time period two |
|------------------------|-------------------------|-----------------|-----------------|
| China                  | 2020/1/24               | 2020/1/22-1/31  | 2020/2/1-3/4    |
| Hubei                  | 2020/1/24               | 2020/1/22-1/31  | 2020/2/1-3/4    |
| China except for Hubei | 2020/1/24               | 2020/1/22-1/31  | 2020/2/1-3/4    |
| Sichuan                | 2020/1/24               | 2020/1/22-1/31  | 2020/2/1-3/4    |
| Guangdong              | 2020/1/23               | 2020/1/22-1/30  | 2020/1/31-3/4   |
| Beijing                | 2020/1/24               | 2020/1/22-1/31  | 2020/2/1-3/4    |
| Shandong               | 2020/1/24               | 2020/1/22-1/31  | 2020/2/1-3/4    |
| Chongqing              | 2020/1/24               | 2020/1/22-1/31  | 2020/2/1-3/4    |

|          |           |                |               |
|----------|-----------|----------------|---------------|
| Zhejiang | 2020/1/23 | 2020/1/22-1/30 | 2020/1/31-3/4 |
| Jiangxi  | 2020/1/24 | 2020/1/22-1/31 | 2020/2/1-3/4  |
| Anhui    | 2020/1/24 | 2020/1/22-1/31 | 2020/2/1-3/4  |
| Jiangsu  | 2020/1/25 | 2020/1/22-2/1  | 2020/2/2-3/4  |
| Hunan    | 2020/1/24 | 2020/1/22-1/31 | 2020/2/1-3/4  |
| Shanghai | 2020/1/24 | 2020/1/22-1/31 | 2020/2/1-3/4  |
| Henan    | 2020/1/25 | 2020/1/22-2/1  | 2020/2/2-3/4  |

The coefficients of the Logistic growth curve models before and after emergency response in China, Hubei province, and twelve high-risk provinces.

**Supplementary Table S2** The coefficients of the logistic growth curve models before the emergency responses

| Area                   | $K_{-1}^a$ | $N_{0-1}^b$ | $r_{-1}^c$ | $R^2_{-1}^d$ |
|------------------------|------------|-------------|------------|--------------|
| China                  | 14650      | 158         | 0.565      | 0.971        |
| Hubei                  | 8495       | 63          | 0.614      | 0.967        |
| China except for Hubei | 6068       | 104         | 0.508      | 0.969        |
| Sichuan                | 275        | 6           | 0.475      | 0.959        |
| Guangdong              | 584        | 10          | 0.498      | 0.969        |
| Beijing                | 180        | 7           | 0.443      | 0.950        |
| Shandong               | 231        | 4           | 0.584      | 0.966        |

|           |     |    |       |       |
|-----------|-----|----|-------|-------|
| Chongqing | 268 | 13 | 0.45  | 0.919 |
| Zhejiang  | 853 | 6  | 0.603 | 0.999 |
| Jiangxi   | 440 | 3  | 0.576 | 0.994 |
| Anhui     | 425 | 8  | 0.469 | 0.972 |
| Jiangsu   | 296 | 4  | 0.509 | 0.970 |
| Hunan     | 443 | 5  | 0.625 | 0.966 |
| Shanghai  | 223 | 4  | 0.44  | 0.984 |
| Henan     | 632 | 11 | 0.468 | 0.953 |

a:  $K_1$ : The maximum cumulative confirmed cases before the emergency responses.

b:  $N_{0_1}$ : The cumulative confirmed cases at the initial time before the emergency responses.

c:  $r_1$ : The average increase rate of the cumulative confirmed cases before the emergency responses.

d:  $R^2_1$ : The coefficient of determination before the emergency responses.

**Supplementary Table S3** The coefficients of the logistic growth curve models after the emergency responses

| Area                   | $K_2^a$ | $N_{0_2}^b$ | $r_2^c$ | $R^2_2^d$ |
|------------------------|---------|-------------|---------|-----------|
| China                  | 66050   | 120         | 0.314   | 0.990     |
| Hubei                  | 58213   | 70          | 0.328   | 0.997     |
| China except for Hubei | 7649    | 25          | 0.343   | 0.963     |
| Sichuan                | 304     | 2           | 0.279   | 0.948     |
| Guangdong              | 820     | 3           | 0.37    | 0.966     |

|           |     |    |       |       |
|-----------|-----|----|-------|-------|
| Beijing   | 225 | 1  | 0.308 | 0.966 |
| Shandong  | 568 | 10 | 0.179 | 0.925 |
| Chongqing | 311 | 2  | 0.313 | 0.966 |
| Zhejiang  | 606 | 1  | 0.435 | 0.951 |
| Jiangxi   | 604 | 1  | 0.397 | 0.969 |
| Anhui     | 647 | 1  | 0.417 | 0.986 |
| Jiangsu   | 361 | 0  | 0.393 | 0.968 |
| Hunan     | 551 | 1  | 0.418 | 0.964 |
| Shanghai  | 157 | 0  | 0.402 | 0.967 |
| Henan     | 702 | 1  | 0.393 | 0.973 |

---

a:  $K_2$ : The maximum cumulative confirmed cases after the emergency responses.

b:  $N_{0_2}$ : The cumulative confirmed cases at the initial time after the emergency responses.

c:  $r_2$ : The average increase rate of the cumulative confirmed cases after the emergency responses.

d:  $R^2_2$ : The coefficient of determination after the emergency responses.
